# Supplementary material for: A simple and economical one-pot method to synthesize high-quality water soluble CdTe QDs
Source: Royal Society of Chemistry journal article supplement (doi:10.1039/c2jm31409f), 2012-01-01
Supplement: c2jm31409f.pdf [file c2jm31409f.pdf]

## A Simple and economic One-pot Method to Synthesize High-quality Water Soluble CdTe QDs

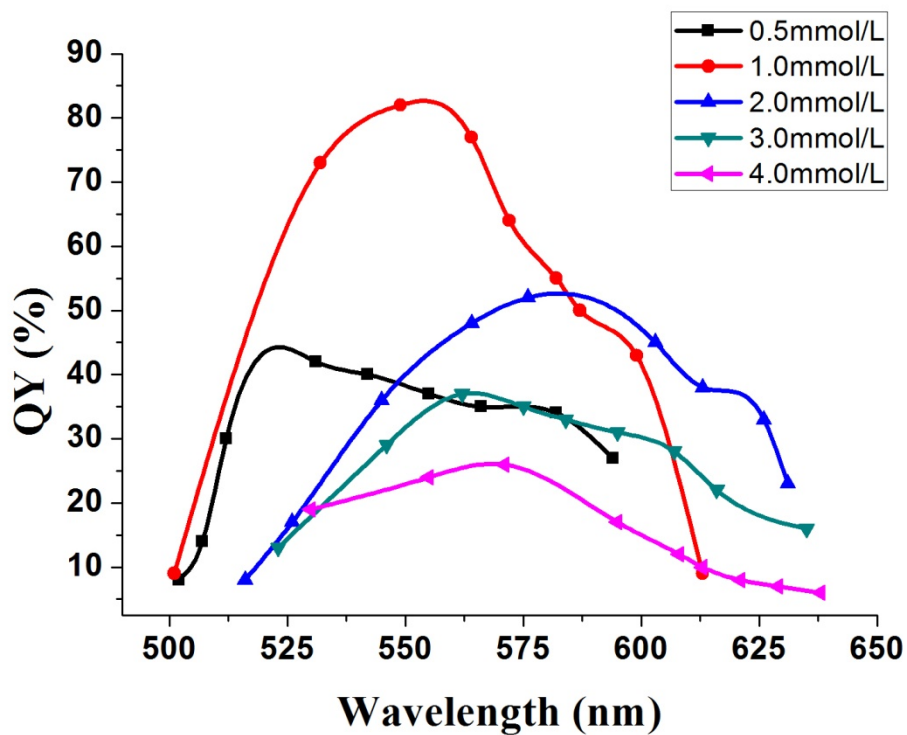

Figure S1. The PLQYs of CdTe QDs prepared at different [Cd<sup>2+</sup>] from 0.5 mmol/L to 4 mmol/L. Experimental conditions: [Cd]:[Te]:TGA:NaBH<sub>4</sub>=1:0.2:1:10, at pH= 10.5.
